# Supplementary material
Source: PubMed Central journal article supplement (PMC4585496)
Supplement: supp_bhu157_bhu157supp.pdf [file supp_bhu157_bhu157supp.pdf]

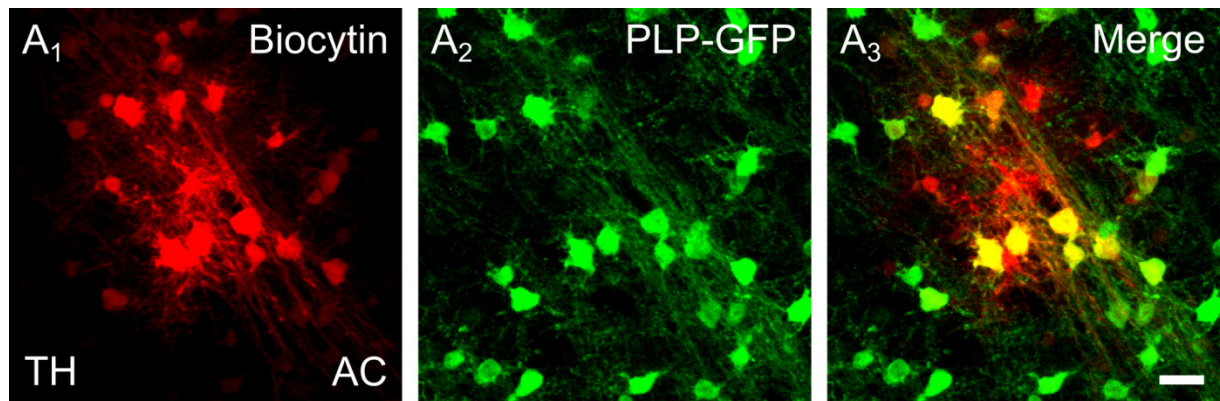

**Supplementary Figure 1: A:O coupling in juvenile (p9-p11) mice.** Astrocytes in the thalamus (TH) of PLP-GFP mice were identified by SR101 labelling (not shown). Astrocytes were tracer filled (A<sub>1</sub>, indicated by AC) and co-stained for GFP (A<sub>2</sub>) revealing diffusion of the tracer into PLP-GFP<sup>+</sup> oligodendrocytes (A<sub>3</sub>). Scale bar, 20  $\mu$ m.

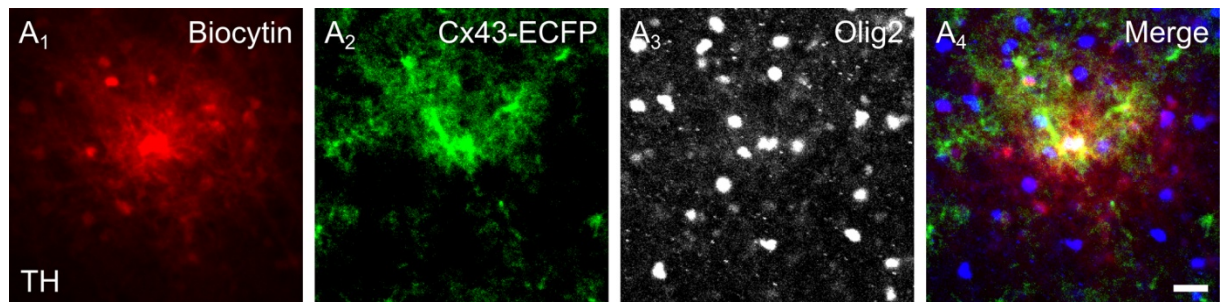

**Supplementary Figure 2: Cx43-expressing cells in biocytin filled networks also express Olig2.** ECFP<sup>+</sup> astrocytes in the thalamus (TH) of Cx43<sup>ECFP/+</sup> mice were filled with biocytin (A<sub>1</sub>) and subsequently stained for Cx43-ECFP (A<sub>2</sub>) and Olig2 (A<sub>3</sub>). In the merged image the overlap of biocytin, ECFP and Olig2 is visible in two cells in the center of the network (A<sub>4</sub>). Scale bar, 20  $\mu$ m.

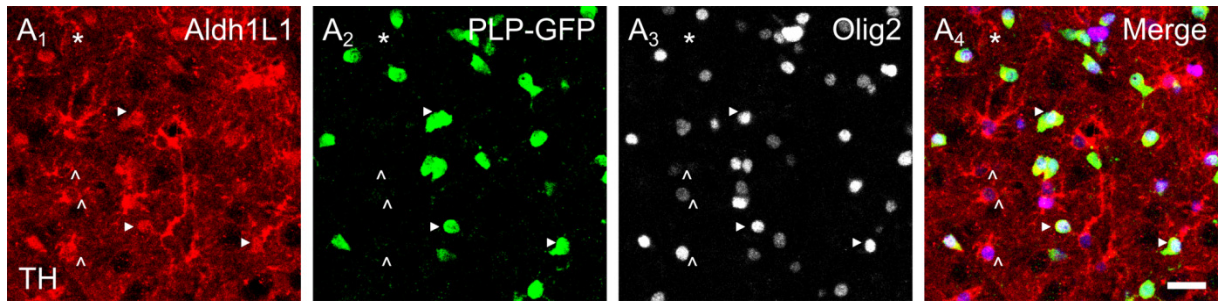

**Supplementary Figure: 3 Aldh1L1 is not a reliable marker for thalamic astrocytes.** Immunostaining for Aldh1L1 (A<sub>1</sub>) was performed in PLP-GFP (A<sub>2</sub>) mice. Additionally, the transcription factor Olig2 (A<sub>3</sub>) was stained (blue in A<sub>4</sub>). Aldh1L1<sup>+</sup> cells express Olig2 at variable amounts (^) whereas some cells do not express Olig2 at all (\*). Unexpectedly, many PLP-GFP<sup>+</sup> cells were stained by Aldh1L1 antibodies (white arrow heads). Scale bar, 20  $\mu$ m.
